# Supplementary material
Source: PubMed Central journal article supplement (PMC3285335)
Supplement: supp_M111.314088_jbc.M111.314088-1.pdf [file supp_M111.314088_jbc.M111.314088-1.pdf]

**Table S1. Primers used for qRT-PCR analysis**

| <b>Genes</b>                          | <b>Primers</b>                                                   |
|---------------------------------------|------------------------------------------------------------------|
| Human <i>MTA1</i>                     | Forward: TGCTCAACGGGAAGTCCTACC<br>Reverse: GGGCATGTAGAACACGTCACC |
| Human <i><math>\beta</math>-actin</i> | Forward: GGACTTCGAGCAAGAGATGG<br>Reverse: AGCACTGTGTTGGCGTACAG   |
| Human <i>RNF144A</i>                  | Forward: GGAGTACCCAGTGGAGCAGA<br>Reverse: AAAATGCCCAACCTGTGT     |

*Notes: MTA1, metastasis-associated protein 1; RNF144A, ring finger protein 144A.*

**Table S2. Primers used for ChIP analysis of human *RNF144A* promoter**

| Region No. | Regions        | Primers                                                                | Size (bp) |
|------------|----------------|------------------------------------------------------------------------|-----------|
| R1         | -456 to -217   | Forward: ATCCTTCAAGACAAGGATAGTG<br>Reverse: CAGCAAGCTAGGAAAGAAGG       | 240       |
| R2         | -906 to -661   | Forward: CCGAAGAACTCATACATACTATTG<br>Reverse: TATATGAACAAAACCTACGAGTGT | 246       |
| R3         | -1366 to -1124 | Forward: TGACATTTCTAAAAAGAATCTGAA<br>Reverse: AACTCCATAGTCCTTAGCTACAAT | 243       |
| R4         | -1788 to -1613 | Forward: GAATGAAGTCACATGTATTACCAC<br>Reverse: AATAAAGGGGTCTGTATTAAGATG | 176       |
| R5         | -2130 to -1953 | Forward: TCACTCAGTATTTATTGAGCACTT<br>Reverse: TCTCTGAGCTGGTGTAACTTAG   | 178       |
| R6         | -2914 to -2668 | Forward: TACAAATTCACATAAACTTCCTTG<br>Reverse: CCTGTCTCTGTTAAAAATACAAAA | 247       |

*Notes: Nomenclature uses first and last nucleotide number, with the translational start being +1. For example, the promoter region -456 to -217 thus starts 456 bases and ends with 217 bases upstream from the coding sequence. R, region; bp, base pair.*

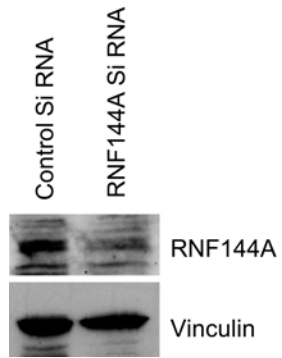

**Fig S1.** Validation of siRNA-mediated gene silencing of RNF144A in human MCF-7 cells by Western blot analysis. Cells were transfected with control or RNF144A specific siRNAs as described in Experimental Procedures and harvested after 48 hrs of the second transfection. Protein extracts were subjected to Western blot analysis with the indicated antibodies.
